# Supplementary material for: Resveratrol decreases cell apoptosis through inhibiting DNA damage in bronchial epithelial cells
Source: PubMed Central journal article supplement — Int J Mol Med. 2020 Mar 16;45(6):1673–84. doi: 10.3892/ijmm.2020.4539 (PMC7169938; doi:10.3892/ijmm.2020.4539), 2020-03-16

Figure S1. Effects of RES on HDM-induced airway hyperresponsiveness. A total of 24 h after the final challenge, whole body plethysmography was used to assess total respiratory system resistance after administration of increasing doses of methacholine (0, 6.25, 12.5, 25 and 50 mg/ml). Data are presented as mean  $\pm$  standard deviation. \* $P$ <0.05 and \*\* $P$ <0.01, determined by one-way analysis of variance with Tukey-Kramer test. RES, resveratrol; HDM, house dust mites.

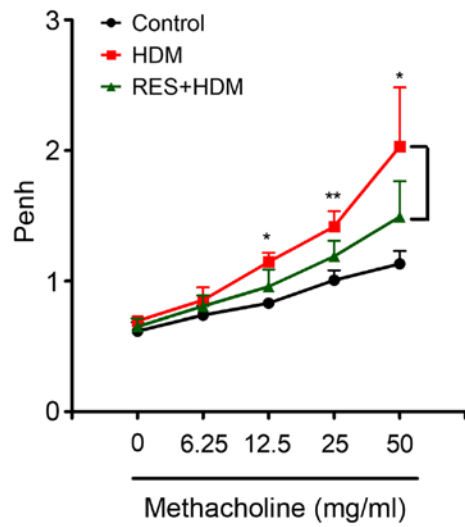

Supplement: Supplementary_Data.pdf [file Supplementary_Data.pdf]
